# Supplementary material
Source: publisher figshare collection journal article supplement (https://tandf.figshare.com/articles/dataset/_/3984520)

## Supemental data

### Role of the sulfur to $\alpha$ -carbon thioether bridges in thurincin H

Magdalena A. Mozolewska,<sup>a</sup> Adam K. Sieradzan,<sup>a,\*</sup> Andrei Niadzvedstki,<sup>a</sup> Cezary Czaplewski,<sup>a</sup>  
Adam Liwo,<sup>a</sup> Paweł Krupa<sup>a</sup>

<sup>a</sup>Faculty of Chemistry, University of Gdańsk, Wita Stwosza 63, 80-308 Gdańsk, Poland

Figure S1. Heat capacity curves of Thurnincin H calculated the consecutive sections of the MREMD simulation without harmonic potentials imposed on the thioether bonds. The 50,000,000 step range (with 25,000 $\times$ 64 snapshots total) was divided into 8 slices (with 200,000 snapshots each) and the respective heat-capacity curves are colored red, orange, yellow, green, cyan, blue, purple, and black for slices 1 – 8, respectively.

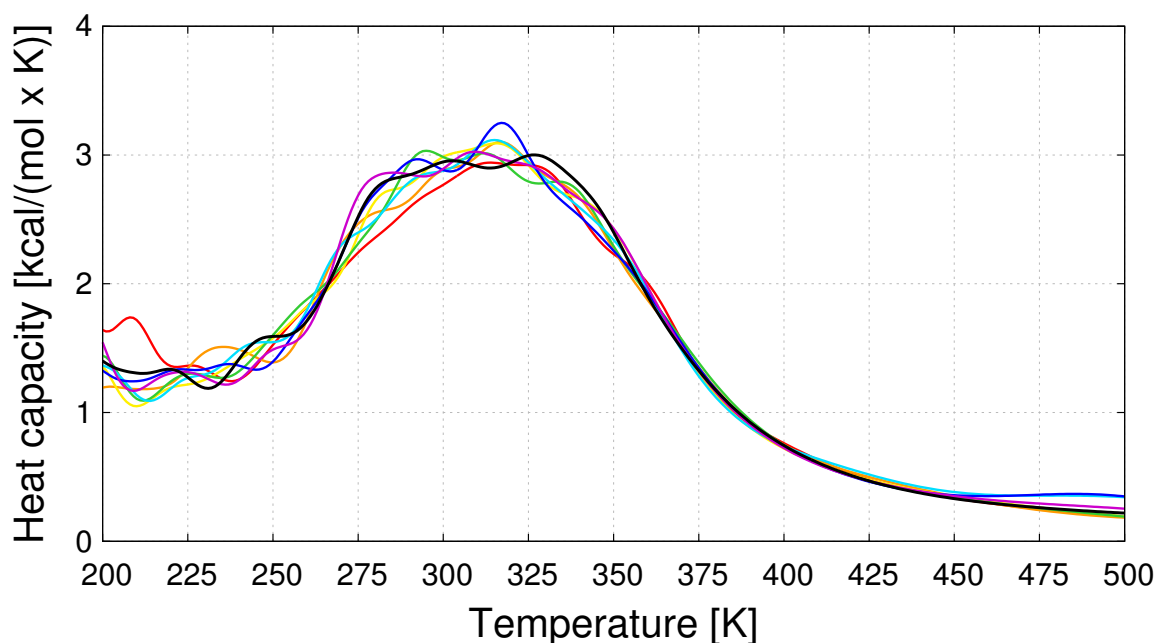

Figure S1

Figure S2. Plots of the fractions of the folded structures (in the temperature from 250 K to 375 K) obtained in the series of unfolding MREMD simulations with the thioether bonds gradually turned off. Each panel corresponds to a given order of switching off the thioether bridges and different graph colors correspond to the the simulation with all 4 bridges (purple), 3 bridges (red), 2 bridges (orange), and 1 bridge (green). The bridged residues are shown in the graphs and color-coded according to the number of bridges.

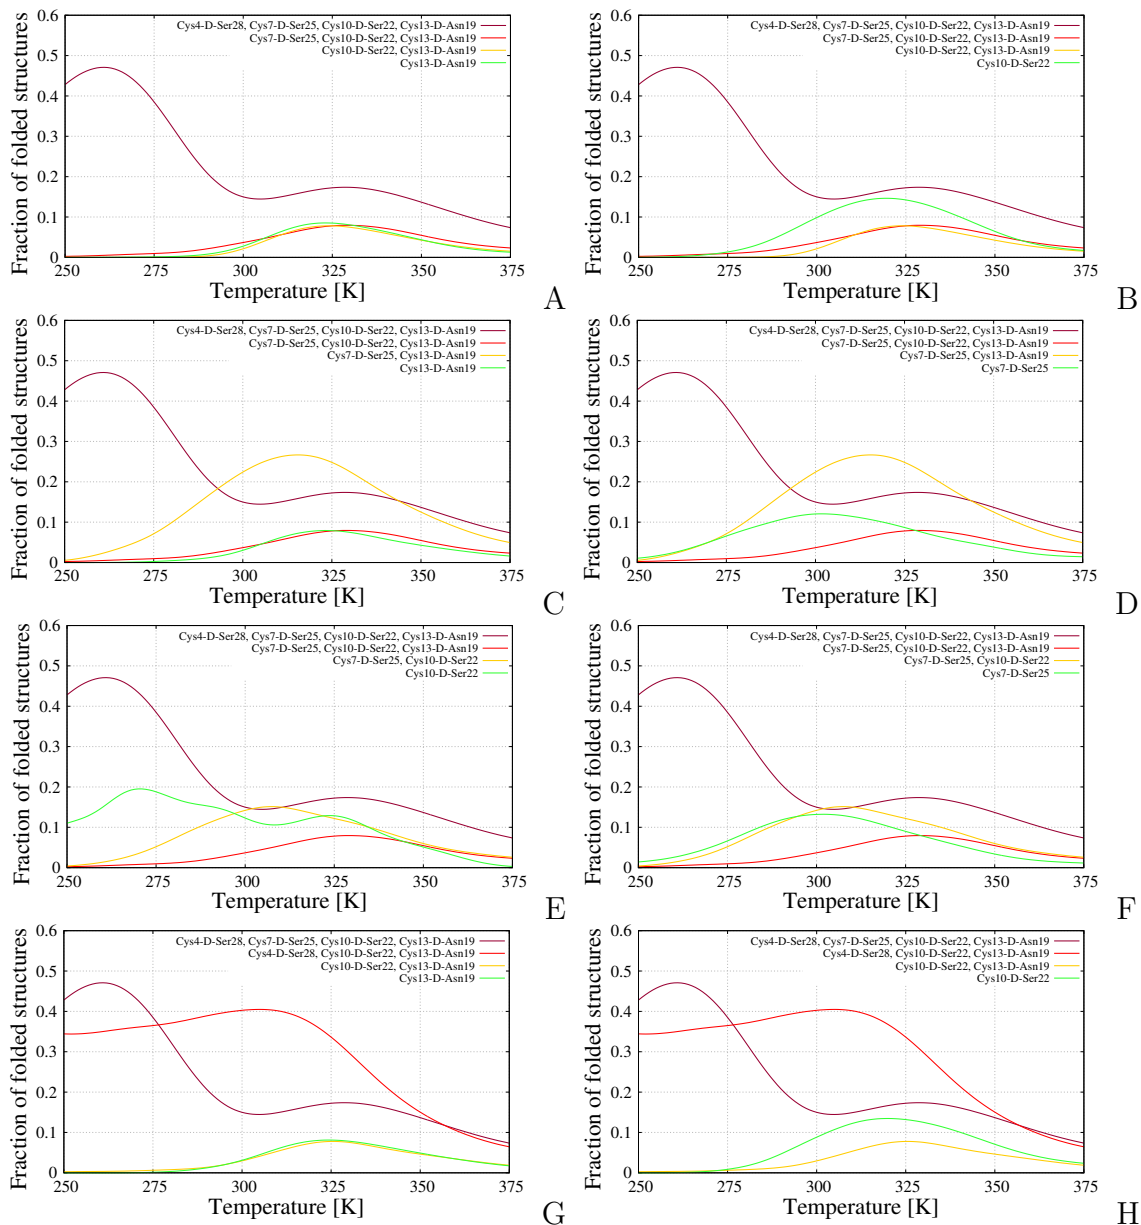

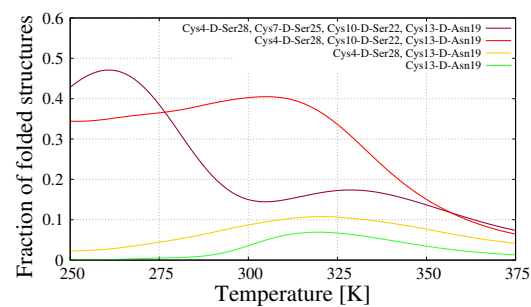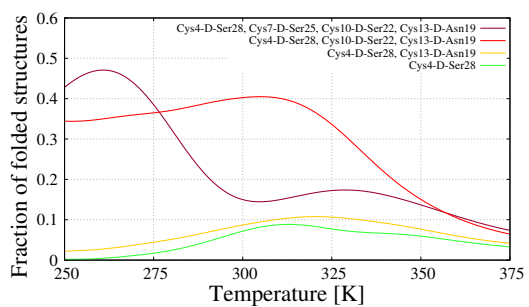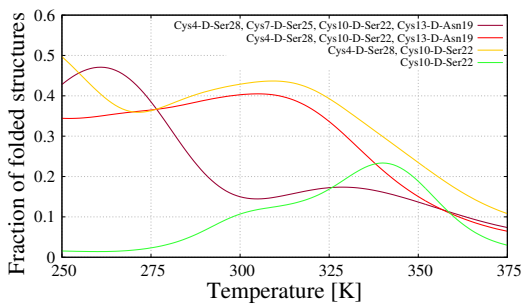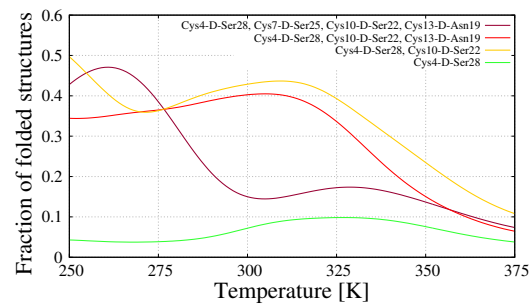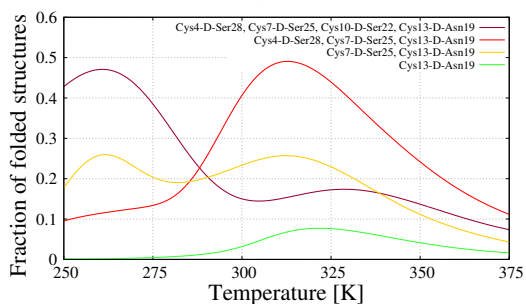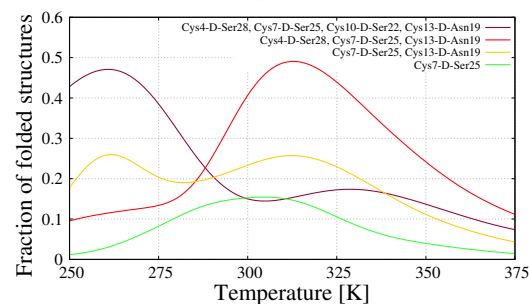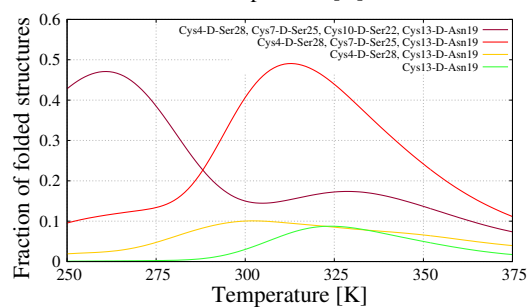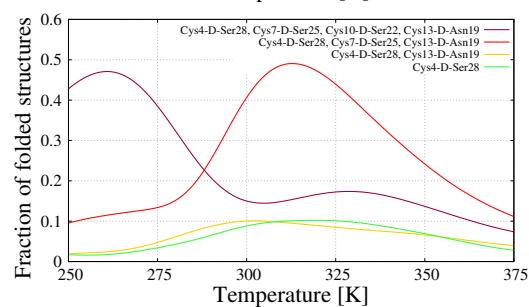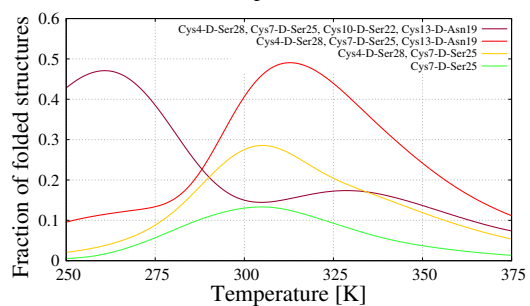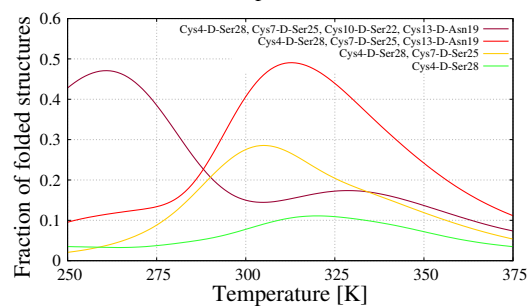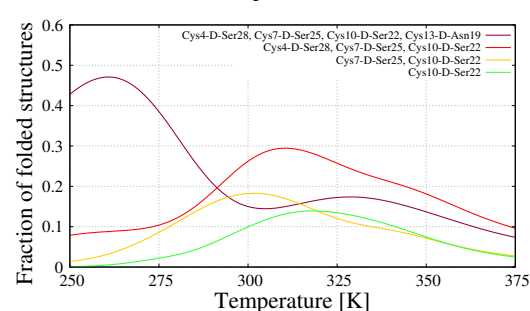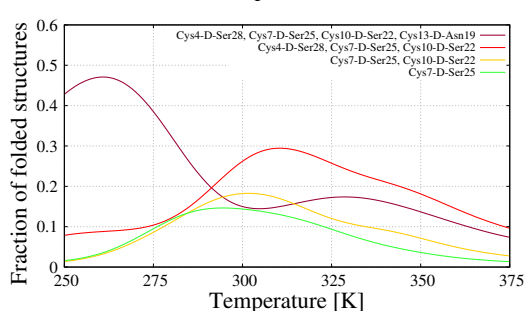

Supplement: Supplementary file 1 [file 1]
